# Supplementary material for: Electrogenerated poly(thiophenes) derivatized by bipyridine ligands and metal complexes
Source: Royal Society of Chemistry journal article supplement (doi:10.1039/b313291a), 2004-01-01
Supplement: b313291a.doc [file b313291a.doc]

# Synthesis

**3-(2-cyanoethylsulfanyl)thiophene 6a**. To a solution of 3-bromothiophene (3 mL , 32 mmol) in anhydrous Et2O (25 mL) under N2 at –78°C was added dropwise a solution of *n*-BuLi 2.5 M in hexane (13.4 mL, 1.05 equiv) in 30 min. After 15 min of stirring at –78°C, the lithiated salt precipitated, and elemental sulfur (1.05 g, 1.05 equiv) was added in one portion. After 30 min of additional stirring at –78°C, the mixture was allowed to warm to room temperature and stirred for 30 min. The solution was cooled down to 0°C and 3-bromopropionitrile (8.23 g , 5.1 mL, 2 equiv) was added dropwise. The mixture was stirred for 1 h at room temperature. After addition of a 0.5 M aqueous solution of HCl (40 mL), the mixture was extracted with CH2Cl2 (200 mL). The organic phases were dried over Na2SO4 and evaporated *in vacuo*. The excess of 3-bromopropionitrile was separated by distillation (1 mbar, 78°C) using a Kugelrhor apparatus. The resulting oil was purified by chromatography on silica gel (eluent: 1:1 CH2Cl2/petroleum ether (PE)) to give compound **6a** as a slightly yellow oil (4.5 g, 83% yield). 1H NMR (CDCl3) ** = 2.57 (t, 2H, 3J= 7.2Hz), 3.02 (t , 2H, 3J= 7.2Hz), 7.08 (dd, 1H, 3J= 4.9Hz, 4J= 1.3Hz), 7.37 (dd, 1H, 4J=1.3Hz, 4J=3.0Hz), 7.38 (dd, 1H, 4J= 3.0Hz, 3J= 4.9Hz). 13C NMR (CDCl3) ** = 18.4, 31.3, 118.0, 127.1, 128.0, 128.4, 130.6. MS (70 eV, EI) m/z (I%) : 169 (M+ •, 53), 129 (54), 116 (29), 85 (50), 71 (100). IR (neat) cm-1 : 2249 (CN). Anal. Calcd for C7H7NS2 : C, 49.67; H, 4.17; S, 37.88; N, 8.28, found : C, 49.20; H, 4.22; S, 36.54; N, 8.10.

**3-(2-Cyanoethyloxy)thiophene 6b**. In a three-necked flask equipped with a Dean and Starck separator, a mixture of 3-methoxythiophene (1 g, 8.76 mmol), of 3-hydroxypropionitrile (2 mL, 2 eq.) and NaHSO4 (50 mg, 0.05 eq.) in toluene (10 mL) was heated one night under N2 at 80°C. Afterward toluene was evaporated and the residue was dissolved in CH2Cl2, this organic phase being washed with water, dried over Na2SO4 and concentrated. The resulting solid was chromatographed on silica gel (1:1 CH2Cl2 / PE) to give **6b** as a beige solid (460 mg, 34% yield). M.p. 67–69 °C. 1H NMR (CDCl3) ** = 2.82 (t, 2H, 3J= 6.4Hz), 4.18 (t, 2H, 3J= 6.4Hz), 6.30 (dd, 1H, 4J= 3.0Hz, 4J= 1.6Hz), 6.78 (dd, 1H, 3J= 5.2Hz, 4J= 1.6Hz), 7.21 (dd, 1H, 3J= 5.2Hz, 4J= 3.0Hz). 13C NMR (CDCl3) ** = 18.5, 64.6, 98.8, 116.9, 119.2, 125.3, 156.4. IR (KBr) cm-1 : 2253 (CN).

**2-Bromo-3-(2-cyanoethylsulfanyl)thiophene 5a**. A solution of NBS (3.15 g, 17.76 mmol) in DMF (25 mL) was added dropwise to **6a** (3 g, 17.72 mmol) in DMF (25 mL) under N2 at 0°C in the absence of light. The mixture was stirred 4 h at 20°C, concentrated and the residue was diluted with CH2Cl2 (200 mL). The organic phase was washed with water (100 mL), dried over Na2SO4 and evaporated *in vacuo* to furnish an oily residue which was chromatographed on silica gel (1:1 CH2Cl2/PE) to give a white solid (3.99 g, 90% yield). M.p 40-41°C. 1H NMR (CDCl3) ** = 2.57 (t, 2H, 3J= 7.5Hz), 3.05 (t, 2H, 3J=7.5Hz), 7.00 (d, 1H, 3J= 5.7Hz), 7.32 (d, 1H, 3J= 5.7Hz). 13C NMR (CDCl3) ** = 18.6, 30.8, 117.8, 118.5, 126.8, 129.6, 131.5. IR (KBr) cm-1 : 2246 (CN). Anal. Calcd for C7H6BrNS2 : C, 33.88; H, 2.44; S, 25.84; N, 5.64, found : C, 33.88; H, 2.38; S, 25.54; N, 5.62.

**2-Bromo-3-(2-cyanoethyloxy)thiophene 5b.** This compound was prepared using the procedure already described for **5a** from **6b** (620 mg, 4 mmol) and NBS (720 mg, 1 eq.). After washing and chromatography on silica gel (1:1 CH2Cl2 / PE), **5b** was obtained as a greenish oil (650 mg, 70% yield). 1H NMR (CDCl3) ** = 2.81 (t, 2H, 3J= 6.5Hz), 4.26 (t, 2H, 3J= 6.5Hz), 6.75 (d, 1H, 3J= 6.0Hz), 7.23 (d, 1H, 3J= 6.0Hz). 13C NMR (CDCl3) ** = 18.8, 66.8, 94.7, 116.7, 118.6, 125.0, 153.1. IR (KBr) cm-1 : 2252 (CN).

**2-(3,4-Ethylenedioxythienyl)-3-(2-cyanoethylsulfanyl)thiophene 3a**. A mixture of **5a** (0.5 g, 2 mmol), **4** (7.8 g, 1.5 eq.) and Pd(PPh3)4 (700 mg, 5% mol) in anhydrous toluene (60 mL) was refluxed overnight under a N2 atmosphere. The black mixture was concentrated and the obtained residue was diluted with CH2Cl2. The organic phase was washed with water, dried over Na2SO4 and evaporated *in vacuo*. Chromatography on silica gel (1:1 CH2Cl2 / PE) gave a solid which was then recrystallised from 1:1 CH2Cl2/PE to give a greenish solid (2.7 g; 72%). M.p. 79-80°C. UV (CH2Cl2) max = 331 nm (log  = 4.19). 1H NMR (CDCl3) ** = 2.53 (t, 2H, 3J= 7.3Hz), 2.99 (t, 2H, 3J= 7.3Hz), 4.24 (m, 2H), 4.36 (m, 2H), 6.39 (s, 1H), 7.04 (d, 1H, 3J= 5.5Hz), 7.27 (d, 1H, 3J= 5.5Hz). 13C NMR (CDCl3) ** = 18.2, 31.8, 64.4, 65.1, 100.1, 109.9, 118.1, 123.1, 124.3, 136.5, 137.0, 139.5, 141.3. IR (KBr) cm-1 : 2246 (CN). MS (70 eV, EI) m/z (I%) : 309 (M+•, 100), 255 (86), 49 (36). HRMS (EI) : calcd for C13H11NO2S3 308.9952, found 308.9956. Anal. Calcd for C13H11NO2S3 : C, 50.46; H, 3.58; S, 31.08; N, 4.53, found C, 50.71; H, 3.53; S, 29.89; N, 4.49.

**2-(3,4-Ethylenedioxythienyl)-3-(2-cyanoethyloxy)thiophene 3b**. This compound was obtained by Stille coupling of compounds **5b** (600 mg, 2.6 mmol) and **4** (1.68 g, 1.5 eq.) in the presence of Pd(PPh3)4 (150 mg) according to the procedure described for **3a**. The pure compound was obtained as a green-brown solid (480 mg, 63% yield) after chromatography on silica gel (1:1 CH2Cl2 / PE). %). M.p. 118-120 °C. UV (CH2Cl2) max = 318 nm (log  = 4.18). 1H NMR (CDCl3) ** = 2.88 (t, 2H, 3J= 6.6Hz), 4.26 – 4.22 (m, 2H), 4.29 (t, 2H, 3J= 6.6Hz), 4.36 – 4.32 (m, 2H), 6.29 (s, 1H), 6.82 (d, 1H, 3J= 5.6Hz), 7.14 (d, 1H, 3J= 5.6Hz). 13C NMR (CDCl3) ** = 18.7, 64.6, 65.0, 66.5, 97.9, 109.6, 115.8, 116.7, 117.0, 122.6, 137.2, 141.2, 150.5. IR (KBr) cm-1 : 2258 (CN). HRMS (EI) : calcd for C13H11NO3S2 293.0181, found 293.0192.

**5,5’-Bis[2-(3,4-ethylenedioxythienyl)-3-thienylsulfanylmethyl]-2,2’-bipyridine (1)**.Under inert atmosphere a solution of cesium hydroxide (263 mg, 2.4 eq.) in 5 mL of degassed methanol was added dropwise to a solution of **3a** (452 mg, 1.4 mmol.) in 10 mL of degassed DMF. The mixture was stirred 1h at 20°C and a solution of 5,5’-bis(bromomethyl)-2,2’-bipyridine16 (250 mg, 0.7 mmol.) in DMF (10 mL) was added. After 4 h of stirring at room temperature, solvents were removed and the residue was dissolved in methylene chloride. The solution was washed with water, dried over Na2SO4 and concentrated. Chromatography on silica gel (CH2Cl2) and recrystallization from methylene chloride gave **1** as a green-beige solid (270 mg, 56 % yield). M.p. 208–209 °C. UV (CH2Cl2) max = 300 nm. 1H NMR (CDCl3) ** = 4.97 (s, 4H), 4.18 (m, 4H), 4.28 (m, 4H), 6.35 (s, 2H), 6.82 (d, 2H, 3J= 5.2Hz), 7.15 (d, 2H, 3J= 5.2Hz), 7.54 (d, 2H, 3J= 8.2Hz), 8.19 (d, 2H, 3J= 8.2Hz), 8.39 (s, 2H). 13C NMR (CDCl3) ** = 37.8, 63.9, 64.6, 99.5, 109.9, 120.1, 123.2, 124.0, 132.4, 133.1, 136.0, 136.8, 138.7, 140.7, 149.0, 154.2. HRMS (FAB) : calcd for C32H24N2O4S6 + H+693.0139, found 693.0118. Anal. Calcd for C32H24N2O4S6 : C, 55.47; H, 3.49; S, 27.77; N, 4.04, found C, 55.05; H, 3.33; S, 27.07; N, 3.95.

**4,4’-Bis[2-(3,4-ethylenedioxythienyl)-3-thienylsulfanylbutyl]-2,2’-bipyridine 2a**. This compound was prepared using the procedure already described for **1** from 4,4’-bis(4-bromobutyl)-2,2’-bipyridine17 (200 mg, 0.47 mmol.), **3a** (320 mg, 2.2 eq.) and CsOH (189 mg, 2.4 eq.). After a chromatography on alumina (CH2Cl2 then 1:1 CH2Cl2 / methyl alcohol), **2a** was obtained as a yellow-brown solid (200 mg, 55% yield). M.p. 140–142 °C. UV (CH2Cl2) nm max = 330 (log  = 4.35); 285 (log  = 4.45). 1H NMR (CDCl3) ** = 1.68 – 1.58 (m, 4H), 1.86 – 1.72 (m, 4H), 2.66 (t, 4H, 3J= 7.7H), 2.84 (t, 4H, 3J= 7.1Hz), 4.23 (m, 4H), 4.33 (m, 4H), 6.35 (s, 2H), 6.98 (d, 2H, 3J= 5.2Hz), 7.07 (dd, 2H, 3J= 4.9Hz, 4J= 1.0Hz), 7.19 (d, 2H, 3J= 5.2Hz), 8.19 (d, 2H, 4J= 1.0Hz), 8.53 (d, 2H, 3J= 4.9Hz). 13C NMR (CDCl3) ** = 29.1, 29.3, 35.0, 36.3, 64.5, 65.0, 99.7, 110.8, 121.3, 123.8, 123.8, 126.9, 131.9, 134.2, 139.0, 141.3, 149.1, 152.1, 156.3. HRMS (FAB) : calcd for C38H36O4N2S6 + H+ 777.1048, found 777.1057. Anal. Calcd for C38H36O4N2S6 : C, 58.73; H, 4.67; S, 24.76; N, 3.60, found C, 58.94; 4.80; S, 24.08; N, 3.64.

**4,4’-Bis[2-(3,4-ethylenedioxythienyl)-3-thienyloxybutyl]-2,2’-bipyridine 2b**. This compound was prepared using the procedure already described for **1** from 4,4’-bis(4-bromobutyl)-2,2’-bipyridine17 (131 mg, 0.3 mmol.), **3b** (200 mg, 2.2 eq.) and CsOH (125 mg, 2.4 eq.). Chromatography on alumina (CH2Cl2 then 1:1 CH2Cl2 / methyl alcohol), **2b** gave a gray solid (47 mg, 21% yield). M.p 208-210 °C. UV (CH2Cl2) nm max = 322 (log  = 4.26); 285 (log  = 4.23). 1H NMR (CDCl3) ** = 1.68 – 1.58 (m, 4H), 2.05 – 1.75 (m, 4H), 2.66 (t, 4H, 3J= 7.1Hz), 4.12 (t, 4H, 3J= 5.6Hz), 4.22 (m, 4H), 4.32 (m, 4H), 6.22 (s, 2H), 6.81 (d, 2H, 3J= 5.5Hz), 7.09 (d, 2H, 3J= 5.5Hz), 7.17 (d, 2H, 3J= 4.9Hz), 8.28 (s, 2H), 8.57 (d, 2H, 3J= 4.9Hz). 13C NMR (CDCl3) ** = 26.8, 29.2, 35.1, 64.6, 65.0, 71.4, 97.2, 110.6, 113.2, 116.2, 121.5, 122.0, 124.1, 136.4, 141.1, 148.9, 152.3, 152.4, 156.2. HRMS (ESI) : calcd for C38H36N2O6S4 + H+ 745.1534, found 745.1532.

**[Ru(2a)(Bipyr)2(PF6)2] CRu1.** Under inert atmosphere, a solution of **2a** (100 mg, 1 eq.) in freshly distilled methylene chloride (15 mL) was added to a solution of [Ru(Bpy)2Cl2](63 mg, 0.128 mmol) in 15 mL of distilled methanol. After 2h of stirring, the complex was precipitated by addition of an aqueous solution of NH4PF6 (1M) filtered and washed with water and then Et2O. The complex was obtained as a black solid (120 mg; 75% yield). M.p 165-170 °C. UV (CH2Cl2) nm max = 567 (log  = 3.94); 330 (log  = 4.52); 299 (log  = 4.92). MS (ESI) for C58H52N6O4S6RuP2F12: 1335 [M - PF6-]

**[Ru(2a)2Cl2] CRu2**. Under inert atmosphere, a solution of **2a** (150 mg, 2 eq.) in freshly distilled methylene chloride (15 mL) was added to a solution of RuCl33H2O (25 mg, 0.096 mmol.) in 15 mL of distilled methanol. The solution immediately becomes brown. After 2 h of stirring at room temperature, the complex was precipitated by addition of Et2O, dried and washed by water and then by a mixture CH2Cl2 / Et2O (1:1). The complex was obtained as a brown solid (100 mg; 60% yield). M.p 131-133 °C. UV (CH2Cl2) nm max = 567 (log  = 3.94); 330 (log  = 4.69); 299 (log  = 4.88). MS (ESI) C76H72N4O8S12RuCl2 : 1724 [M+.].

**[Fe(2a)3(PF6)2] CFe**. Under inert atmosphere, a solution of **2a** (200 mg, 3 eq.) in freshly distilled methylene chloride (20 mL) was added to a solution of FeSO47H2O (71.5 mg, 0.26 mmol) in 20 mL of distilled methanol. The solution immediately becomes red. After 2 h of stirring at room temperature, the complex was precipitated by addition of an aqueous solution of NH4PF6 (1M) and filtered. The obtained solid was washed with water and then with CH2Cl2 /Et2O (1:1). The complex was obtained as a brown-pink solid (200 mg; 30% yield). M.p 95-100 °C. UV (CH2Cl2) nm max = 533 (log  = 4.11); 331 (log  = 4.98); 299 (log  = 5.18). MS (ESI) for C114H108N6O12S18FeP2F12 : 2529 [M – PF6-].
